# Supplementary material for: Demographic Patterns of MS Patients Using BRISA: An MS-Specific App in Germany
Source: MDPI journal article supplement (doi:10.3390/jpm12071100), 2022-07-01
Supplement: s1 [file s1]

Article

# Demographic Patterns of MS Patients Using BRISA: An MS-Specific App in Germany

Preetha Balakrishnan, Jannis Groenberg, Elizabeth Jacyshyn-Owen, Markus Eberl, Benjamin Friedrich, Natalie Joschko and Tjalf Ziemssen

## Supplementary material

**Table S1.** Overview of study cohort in categories ‘age group’, ‘MS-type’, ‘time since diagnosis’ and ‘medication category’.

|                      | Groups       | Users       | %    |
|----------------------|--------------|-------------|------|
| Age group            | 18–25        | 183         | 10.1 |
|                      | 26–35        | 567         | 31.3 |
|                      | 36–45        | 498         | 27.5 |
|                      | 46–55        | 421         | 23.3 |
|                      | >55          | 162         | 7.8  |
|                      | <b>Total</b> | <b>1831</b> |      |
| MS-type              | RRMS         | 1200        | 78.4 |
|                      | PPMS         | 151         | 9.9  |
|                      | SPMS         | 158         | 10.3 |
|                      | Other        | 22          | 1.4  |
|                      | <b>Total</b> | <b>1531</b> |      |
| Time since diagnosis | 0–1          | 247         | 13.0 |
|                      | 2–5          | 607         | 31.9 |
|                      | 6–10         | 354         | 18.6 |
|                      | 11–20        | 355         | 18.7 |
|                      | 21–30        | 339         | 17.8 |
|                      | <b>Total</b> | <b>1902</b> |      |
| Medication category  | Category 1   | 581         | 44.2 |
|                      | Category 2   | 232         | 17.7 |
|                      | Category 3   | 501         | 38.1 |
|                      | <b>Total</b> | <b>1314</b> |      |

**Supplemental Methods:** Detailed description of all PRO questionnaires used in BRISA app.

The questionnaires implemented in BRISA are:

- *Beck Depression Inventory - Fast Screen (BDI-FS)*
- *Bladder Control Scale (BLCS)*
- *Bowel Control Scale (BWCS)*
- *Patient-determined Disease Steps (PDDS)*
- *Modified Fatigue Impact Scale – 5-Item Version (MFIS-5)*
- *Impact of Visual Impairment Scale (IVIS)*
- *MOS Pain Effects Scale (PES)*
- *Perceived Deficits Questionnaire - 5-Item Version (PDQ-5)*
- *Sexual Satisfaction Scale (SSS)*

Except the “Beck Depression Inventory” and “Patient-determined Disease Steps” [47] all questionnaires used for this study are taken from the Multiple Sclerosis Quality of Life Inventory [48]. For a more detailed description of the used questionnaires check supplemental methods section.

#### *Beck Depression Inventory - Fast Screen (BDI-FS)*

The Beck Depression Inventory - Fast Screen is derived from Beck Depression Inventory II for measuring the severity level of depression in patients with possible physical limitations. The questionnaire consists of 7 groups of statements. For each statement there are four possible answers, which are ordered according to their intensity and assigned a score from 0–3. The individual scores are summed up and can result in a total score of 0–21, with a higher score indicating greater severity of depression.

#### *Bladder Control Scale (BLCS)*

The Bladder Control Scale (BLCS) was used to measure bladder problems that may occur in MS. The answering of the question refers to the last 4 weeks before answering the questionnaire. It is a set of 4 items to measure bladder control and the extent to which bladder problems have an impact on everyday activities. The first 3 items are rated on a scale of 0–4, where 0 indicates “not at all” and 4 indicates “daily”. The fourth

item is rated in a scale of 0–10, where 0 indicates “not at all” and 10 indicates “severely”. Each participant receives a total score between 0 and 22, with higher scores representing poorer bladder control and a greater impact of this on daily activities.

#### *Bowel Control Scale (BWCS)*

Bowl problems that may occur in MS and their impact on everyday activities was measured with the Bowel Control Scale (BWCS). It is a set of 5 items to measure bowl control and the extent to which bowl problems have an impact on daily activities. The first 4 items are rated on a scale of 0–4, where 0 indicates “not at all” and 4 indicates “daily”. The fifth item is rated in a scale of 0–10, where 0 indicates “not at all” and 10 indicates “severely”. Each participant receives a total score between 0 and 26, with higher scores indicating poorer bowel control and stronger impairment of daily activities.

#### *Patient-determined Disease Steps (PDDS)*

To visualize the progression of MS in patients, the Patient-determined Disease Steps questionnaire was used. This consists of a list of 9 categories describing disease severity with a special focus on the mobility of MS patients. Each of the 9 categories is assigned a score from 0–8. The patient selects the appropriate category and receives the corresponding score. A higher score describes a reduced mobility[47].

#### *Modified Fatigue Impact Scale – 5-Item Version (MFIS-5)*

The Modified Fatigue Impact Scale - 5-Item Version was used to measure how fatigue may affect patients. The answering of the question refers to the last 4 weeks before answering the questionnaire. It is a set of 5 items to measure fatigue and the extent to which fatigue has an impact on everyday activities. The 5 items are rated on a scale of 0–4, where 0 indicates “never” and 4 indicates “almost always”. Each participant receives a total score between 0 and 20, with higher scores representing greater severity of fatigue and greater impairment of daily activities.

#### *Impact of Visual Impairment Scale (IVIS)*

The Impact of Visual Impairment Scale was used to assess visual problems that can occur in MS and their impact on daily activities. It is a series of 5 questions about visual impairments and the extent to which they affect daily activities. The questions are scored on a scale of 0 to 3, with 0 being 'not at all difficult' and 3 being 'not possible due to visual problems'. Each participant is given a total score between 0 and 15, with higher scores indicating greater impairment of vision and therefore greater impairment of daily living.

### *MOS Pain Effects Scale (PES)*

The MOS Pain Effects Scale was used to measure the experience of unpleasant sensory symptoms because of MS. The answering of the question refers to the last 4 weeks before answering the questionnaire. It is a set of 6 items to measure how much the sensory symptoms interfere with daily life. The 6 items are rated on a scale of 1–5, where 1 indicates “not at all” and 5 indicates “to an extreme degree”. Each participant receives a total score between 6 and 35, with higher scores representing greater interfering of the unpleasant sensory symptoms with everyday activities.

### *Perceived Deficits Questionnaire - 5-Item Version (PDQ-5)*

The Perceived Deficits Questionnaire - 5-Item Version (PDQ-5) was used to assess cognitive dysfunction specific to MS. It is a series of 5 items scored on a scale of 0 to 4, with 0 representing “never” and 4 representing “almost always”, to measure different areas of cognitive function that are commonly impaired in MS. The total score ranges from 0 to 20, with higher scores representing more pronounced cognitive dysfunction.

### *Sexual Satisfaction Scale (SSS)*

To assess the impairment of sexual function in patients with MS, we have used the Sexual Satisfaction Scale. The questionnaire consists of a total of 5 questions, whereby the first question can only be answered with yes/no with a corresponding score of 0–1. The other questions are scored from 1–6, where 1 stands for “very satisfied” and 6 for “very dissatisfied”. The total score can be between 0–25. A higher score indicates more pronounced sexual dissatisfaction.

Researchers/Research-Tools/Clinical-Study-Measures/Multiple-Sclerosis-Quality-of-Life-Inventory-(MSQL (accessed 2 May 2022).
